# Supplementary material for: Physicochemical activation of soap-nut seeds-derived hard carbon as a sustainable anode for lithium-ion batteries
Source: Royal Society of Chemistry journal article supplement (doi:10.1039/d4nj03372h), 2024-01-01
Supplement: d4nj03372h1.pdf [file d4nj03372h1.pdf]

## ***Supporting Information***

### **Physicochemical Activation of Soap-Nut Seeds-Derived Hard Carbon as a Sustainable Anode for Lithium-Ion Batteries**

**Sumit Khatua,<sup>1,2</sup> K. Ramakrushna Achary,<sup>1,2</sup> Y. Bhaskara Rao,<sup>3</sup> Sasikumar K,<sup>1,2</sup>**

**Akshaya K. Samal,<sup>4</sup> L. N. Patro<sup>1,2\*</sup>**

*<sup>1</sup>Solid State Ionics Lab, Department of Physics, SRM University AP, Amaravati, 522240, Andhra Pradesh, India*

*<sup>2</sup>SRM-Amara Raja Center for Energy Storage Devices, SRM University AP, Amaravati 522240, Andhra Pradesh, India*

*<sup>3</sup>Department of Chemistry, Umeå University, Umea, 90187, Sweden*

*<sup>4</sup>Centre for Nano and Material Sciences, Jain University, Jain Global Campus, Ramanagara, Bangalore 562112, India*

---

**\*Corresponding author:** [laxminarayana.p@srmmap.edu.in](mailto:laxminarayana.p@srmmap.edu.in); [patro1ng@gmail.com](mailto:patro1ng@gmail.com) (L. N. Patro)

**Tel:** 0863-2343000

**Fax:** 0863-2343111

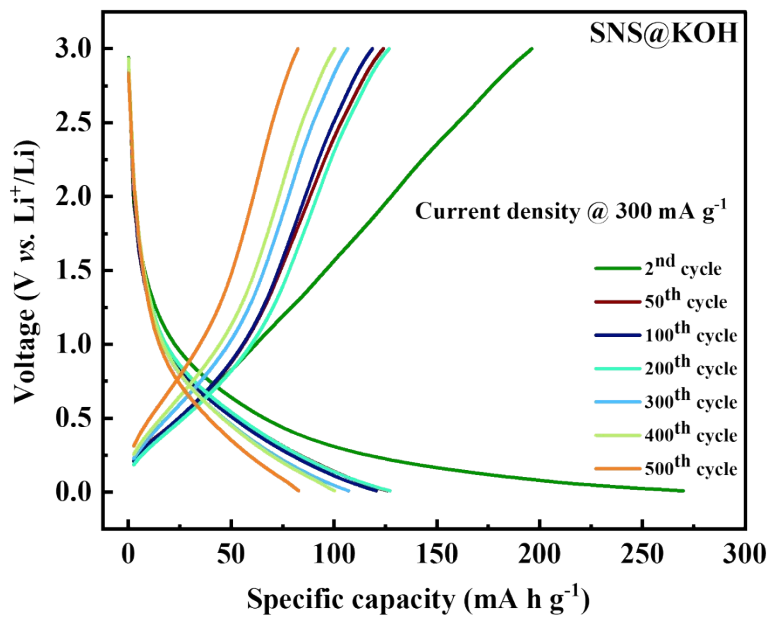

*Fig. S1. Discharge/charge profiles for SNS@KOH hard carbon at a current density of 300 mA g<sup>-1</sup> during higher cycles. .*

**Table S1:** Electrochemical performance of biomass-derived hard carbon, SNS@KOH with earlier known natural and synthetic graphite for Li-ion battery applications.

| <i>Sl. No.</i> | <i>Anode</i>       | <i>Current density<br/>(mA g<sup>-1</sup>)</i> | <i>Discharge specific<br/>capacity (mA h g<sup>-1</sup>)</i> | <i>Reference</i> |
|----------------|--------------------|------------------------------------------------|--------------------------------------------------------------|------------------|
| 1.             | Natural graphite   | 74 (0.2 C)                                     | 378                                                          | [1]              |
| 2.             | Natural graphite   | 74 (0.2 C)                                     | 355                                                          | [2]              |
| 3.             | Synthetic graphite | 37 (0.1 C)                                     | 310.3                                                        | [3]              |
| 4.             | Synthetic graphite | 50                                             | 347                                                          | [4]              |
| 5.             | SNS@KOH            | 100                                            | 454                                                          | This work        |

### References

1. H. P. T. S. Hewathilake, N. Karunarathne, A. Wijayasinghe, N. W. B. Balasooriya, A. K. Arof, Performance of developed natural vein graphite as the anode material of rechargeable lithium ion batteries. *Ionics*, 2017, **23**, 1417-1422.  
<https://doi.org/10.1007/s11581-016-1953-1>.
2. M. Simón, A. Benítez, A. Caballero, J. Morales, O. Vargas, Untreated natural graphite as a graphene source for high-performance Li-ion batteries. *Batteries*, 2018, **4**, 13.  
<https://doi.org/10.3390/batteries4010013>.
3. B. Xing, C. Zhang, Y. Cao, G. Huang, Q. Liu, C. Zhang, Z. Chen, G. Yi, L. Chen, J. Yu, Preparation of synthetic graphite from bituminous coal as anode materials for high performance lithium-ion batteries. *Fuel process. Technol.*, 2018, **172**, 162-171.  
<https://doi.org/10.1016/j.fuproc.2017.12.018>.

4. L. Han, X. Zhu, F. Yang, Q. Liu, X. Jia, *Eco-conversion of coal into a nonporous graphite for high-performance anodes of lithium-ion batteries. Powder technol.*, 2021 **382**, 40-47.

<https://doi.org/10.1016/j.powtec.2020.12.052>.
